# Supplementary material
Source: publisher figshare collection journal article supplement (https://geolsoc.figshare.com/articles/dataset/_/3454634)
Supplement: Supplementary file 1 [file 1]

**Table A2.** Major and trace element concentrations from total digestions of streambed sediment from the Boulder River watershed study area, Montana, collected in July 2001 and Sept. 2003. The first two digits of the field number indicate the sampling year.

| Field No.                      | Site | Al        | Ca  | Fe   | K   | Mg   | Na  | P    | Ti   | Ag | As    | Ba                  | Cd | Co | Cr  | Cu  | Mn    | Mo | Ni | Pb    | Sr  | V   | Zn    |
|--------------------------------|------|-----------|-----|------|-----|------|-----|------|------|----|-------|---------------------|----|----|-----|-----|-------|----|----|-------|-----|-----|-------|
|                                |      | (percent) |     |      |     |      |     |      |      |    |       | (parts per million) |    |    |     |     |       |    |    |       |     |     |       |
| <b>Boulder River</b>           |      |           |     |      |     |      |     |      |      |    |       |                     |    |    |     |     |       |    |    |       |     |     |       |
| 01-BMS-010                     | 2S   | 8.2       | 3.0 | 3.1  | 2.2 | 1.1  | 2.5 | 0.08 | 0.44 | <2 | <10   | 930                 | 3  | 8  | 43  | 22  | 1,200 | <2 | 15 | 22    | 730 | 94  | 110   |
| 03-BMS-110                     | 2S   | 8.1       | 2.6 | 2.7  | 2.1 | 0.86 | 2.3 | 0.04 | 0.40 | <2 | 10    | 960                 | <2 | 7  | 40  | 18  | 1,300 | 3  | 15 | 24    | 690 | 83  | 110   |
| 01-BMS-011                     | 6S   | 7.9       | 3.2 | 4.5  | 2.0 | 1.0  | 2.6 | 0.09 | 0.56 | <2 | 26    | 840                 | 4  | 13 | 52  | 110 | 980   | <2 | 14 | 32    | 700 | 150 | 250   |
| 03-BMS-111                     | 6S   | 8.2       | 2.8 | 2.9  | 2.1 | 0.90 | 2.5 | 0.08 | 0.40 | <2 | 20    | 860                 | 4  | 8  | 39  | 87  | 1,300 | 2  | 14 | 38    | 680 | 92  | 490   |
| 01-BMS-014                     | 9S   | 7.4       | 2.8 | 5.9  | 2.0 | 0.92 | 2.4 | 0.09 | 0.58 | <2 | 39    | 830                 | 7  | 18 | 62  | 65  | 1,100 | <2 | 15 | 47    | 630 | 200 | 440   |
| 03-BMS-114                     | 9S   | 8.1       | 2.7 | 3.2  | 2.2 | 0.84 | 2.4 | 0.08 | 0.38 | <2 | 47    | 860                 | 9  | 11 | 42  | 110 | 1,500 | 3  | 15 | 65    | 640 | 100 | 660   |
| 01-BMS-017                     | 12S  | 7.8       | 2.8 | 5.1  | 2.2 | 0.75 | 2.5 | 0.08 | 0.40 | <2 | 220   | 830                 | 7  | 15 | 55  | 110 | 1,200 | 3  | 13 | 100   | 670 | 170 | 690   |
| 03-BMS-117                     | 12S  | 7.8       | 2.7 | 5.4  | 2.1 | 0.83 | 2.3 | 0.10 | 0.52 | 2  | 270   | 820                 | 10 | 18 | 55  | 120 | 1,700 | 4  | 15 | 120   | 580 | 180 | 1,000 |
| 01-BMS-018                     | 13S  | 7.9       | 2.8 | 5.3  | 2.2 | 0.88 | 2.4 | 0.09 | 0.47 | <2 | 210   | 880                 | 8  | 16 | 57  | 96  | 1,200 | <2 | 14 | 89    | 670 | 180 | 760   |
| 01-BMS-018-d                   | 13S  | 7.7       | 2.8 | 5.4  | 2.2 | 0.86 | 2.4 | 0.09 | 0.46 | <2 | 170   | 850                 | 8  | 15 | 57  | 86  | 1,100 | <2 | 15 | 91    | 640 | 180 | 740   |
| 03-BMS-118                     | 13S  | 7.8       | 2.5 | 4.1  | 2.8 | 1.5  | 1.8 | 0.13 | 0.46 | <2 | 34    | 650                 | 8  | 20 | 27  | 100 | 1,400 | 5  | 20 | 68    | 380 | 110 | 670   |
| 01-BMS-019                     | 15S  | 7.3       | 2.4 | 5.8  | 2.2 | 0.82 | 2.2 | 0.08 | 0.42 | 4  | 260   | 880                 | 8  | 19 | 59  | 120 | 1,100 | <2 | 15 | 120   | 600 | 190 | 880   |
| 03-BMS-119                     | 15S  | 7.4       | 2.5 | 8.6  | 2.2 | 0.81 | 2.0 | 0.11 | 0.58 | 3  | 390   | 810                 | 8  | 26 | 89  | 120 | 1,400 | 5  | 18 | 120   | 490 | 300 | 860   |
| <b>Basin Creek Drainage</b>    |      |           |     |      |     |      |     |      |      |    |       |                     |    |    |     |     |       |    |    |       |     |     |       |
| 01-BMS-001                     | 20S  | 7.4       | 2.3 | 15.0 | 2.3 | 1.0  | 1.5 | 0.24 | 0.91 | <2 | 60    | 610                 | 11 | 52 | 150 | 36  | 1,400 | 6  | 26 | 78    | 290 | 630 | 280   |
| 03-BMS-101                     | 20S  | 8.3       | 2.4 | 9.1  | 2.6 | 0.86 | 1.7 | 0.20 | 0.65 | <2 | 66    | 590                 | 4  | 28 | 78  | 25  | 1,100 | 6  | 17 | 75    | 330 | 370 | 240   |
| 01-BMS-002                     | 21S  | 7.7       | 2.4 | 8.9  | 2.3 | 1.0  | 1.6 | 0.17 | 0.66 | 5  | 2,500 | 560                 | 11 | 33 | 72  | 110 | 1,700 | 3  | 18 | 1,000 | 330 | 330 | 800   |
| 03-BMS-102                     | 21eS | 8.8       | 2.6 | 6.2  | 2.4 | 1.2  | 1.8 | 0.18 | 0.60 | <2 | 460   | 570                 | 5  | 23 | 49  | 54  | 1,000 | 5  | 18 | 260   | 360 | 230 | 440   |
| 01-BMS-006                     | 24S  | 7.5       | 1.4 | 3.5  | 2.6 | 0.61 | 1.3 | 0.10 | 0.34 | <2 | 130   | 760                 | 6  | 14 | 22  | 48  | 1,200 | 3  | 14 | 180   | 280 | 89  | 410   |
| 01-BMS-008                     | 26S  | 7.4       | 1.9 | 4.6  | 2.4 | 0.84 | 1.5 | 0.12 | 0.46 | 2  | 410   | 700                 | 10 | 28 | 35  | 220 | 1,500 | 4  | 14 | 220   | 310 | 140 | 790   |
| 01-BMS-009                     | 31S  | 6.9       | 1.8 | 5.4  | 2.6 | 0.68 | 1.6 | 0.11 | 0.48 | <2 | 120   | 750                 | 8  | 22 | 50  | 88  | 1,400 | 2  | 14 | 150   | 340 | 180 | 600   |
| 03-BMS-109                     | 31S  | 7.8       | 1.8 | 3.5  | 2.9 | 0.68 | 1.6 | 0.09 | 0.38 | <2 | 140   | 800                 | 7  | 13 | 26  | 90  | 1,300 | 4  | 12 | 150   | 330 | 110 | 640   |
| 01-BMS-007                     | 42S  | 7.0       | 2.7 | 6.0  | 2.3 | 1.2  | 1.6 | 0.15 | 0.65 | 3  | 490   | 620                 | 13 | 35 | 50  | 290 | 1,700 | 3  | 17 | 270   | 330 | 200 | 1,300 |
| 03-BMS-107                     | 42S  | 7.5       | 2.3 | 5.2  | 2.3 | 1.0  | 1.6 | 0.11 | 0.44 | 4  | 620   | 660                 | 20 | 42 | 37  | 430 | 2,400 | 6  | 19 | 320   | 320 | 150 | 2,200 |
| <b>Cataract Creek Drainage</b> |      |           |     |      |     |      |     |      |      |    |       |                     |    |    |     |     |       |    |    |       |     |     |       |
| 01-BMS-003                     | 46S  | 7.1       | 2.8 | 15.0 | 2.0 | 0.86 | 2.2 | 0.14 | 0.83 | <2 | 28    | 670                 | 11 | 45 | 140 | 29  | 1,200 | <2 | 21 | 48    | 450 | 580 | 210   |
| 03-BMS-103                     | 46S  | 7.3       | 2.7 | 15.0 | 1.8 | 0.86 | 2.1 | 0.13 | 0.81 | <2 | 74    | 660                 | 5  | 40 | 140 | 33  | 1,300 | 4  | 22 | 30    | 430 | 620 | 220   |
| 01-BMS-004                     | 49S  | 7.9       | 2.7 | 5.1  | 2.3 | 0.88 | 2.3 | 0.11 | 0.44 | 5  | 120   | 670                 | 6  | 13 | 40  | 120 | 1,100 | <2 | 14 | 130   | 500 | 170 | 600   |
| 03-BMS-104                     | 49S  | 6.0       | 2.3 | 19.0 | 1.7 | 0.60 | 1.8 | 0.12 | 1.2  | 4  | 110   | 750                 | 8  | 56 | 190 | 100 | 1,800 | 5  | 25 | 74    | 360 | 820 | 360   |
| 01-BMS-005                     | 50S  | 7.1       | 2.4 | 10.0 | 2.2 | 0.64 | 2.1 | 0.10 | 0.74 | 6  | 570   | 690                 | 22 | 61 | 84  | 740 | 2,500 | 2  | 17 | 360   | 430 | 360 | 1,800 |
| 03-BMS-105                     | 50S  | 8.0       | 2.4 | 5.9  | 2.4 | 0.74 | 2.2 | 0.11 | 0.59 | 13 | 720   | 650                 | 22 | 43 | 41  | 770 | 2,500 | 6  | 14 | 510   | 440 | 180 | 2,300 |
| 03-BMS-105R                    | 50S  | 7.8       | 2.4 | 5.8  | 2.3 | 0.72 | 2.1 | 0.10 | 0.58 | 11 | 670   | 630                 | 22 | 42 | 41  | 740 | 2,400 | 6  | 14 | 490   | 420 | 180 | 2,200 |

| Field No.                      | Site | Al        | Ca  | Fe   | K   | Mg   | Na   | P    | Ti   | Ag | As    | Ba                  | Cd | Co | Cr  | Cu    | Mn     | Mo | Ni | Pb    | Sr  | V   | Zn    |
|--------------------------------|------|-----------|-----|------|-----|------|------|------|------|----|-------|---------------------|----|----|-----|-------|--------|----|----|-------|-----|-----|-------|
|                                |      | (percent) |     |      |     |      |      |      |      |    |       | (parts per million) |    |    |     |       |        |    |    |       |     |     |       |
| 01-BMS- 013                    | 53S  | 7.3       | 2.2 | 6.9  | 2.6 | 0.77 | 2.0  | 0.10 | 0.46 | 2  | 160   | 870                 | 13 | 30 | 73  | 260   | 1,400  | 2  | 17 | 150   | 450 | 240 | 1,200 |
| 03-BMS-113                     | 53S  | 7.7       | 2.2 | 3.9  | 2.5 | 0.60 | 2.2  | 0.08 | 0.35 | 4  | 310   | 690                 | 15 | 20 | 35  | 360   | 1,400  | 5  | 12 | 310   | 460 | 130 | 1,500 |
| 01-BMS- 012                    | 57S  | 6.8       | 2.1 | 9.6  | 2.1 | 0.67 | 2.0  | 0.11 | 1.2  | 5  | 1,200 | 640                 | 27 | 62 | 70  | 1,400 | 3,300  | 4  | 16 | 740   | 380 | 320 | 1,600 |
| 03-BMS-112                     | 57S  | 7.3       | 1.8 | 5.2  | 2.2 | 0.60 | 1.8  | 0.10 | 0.50 | 8  | 1,300 | 550                 | 26 | 45 | 30  | 1,200 | 2,400  | 8  | 12 | 840   | 370 | 140 | 1,900 |
| <b>High Ore Creek Drainage</b> |      |           |     |      |     |      |      |      |      |    |       |                     |    |    |     |       |        |    |    |       |     |     |       |
| 01-BMS- 015                    | 59S  | 6.8       | 1.9 | 8.8  | 2.0 | 0.50 | 2.1  | 0.14 | 0.30 | 20 | 2,200 | 590                 | 19 | 29 | 74  | 230   | 3,500  | 7  | 17 | 1,200 | 440 | 230 | 2,600 |
| 03-BMS-115                     | 59S  | 6.7       | 1.8 | 7.3  | 2.0 | 0.47 | 1.9  | 0.12 | 0.27 | 17 | 2,000 | 630                 | 28 | 37 | 61  | 190   | 11,000 | 8  | 23 | 1,000 | 420 | 190 | 5,900 |
| 01-BMS- 016                    | 63S  | 4.5       | 1.7 | 19.0 | 1.6 | 0.58 | 1.0  | 0.13 | 0.36 | 33 | 6,000 | 510                 | 37 | 78 | 180 | 520   | 7,000  | 15 | 28 | 1,200 | 240 | 690 | 5,500 |
| 03-BMS-116                     | 63S  | 5.8       | 1.9 | 12.0 | 2.1 | 0.66 | 1.3  | 0.12 | 0.36 | 26 | 3,000 | 610                 | 22 | 41 | 100 | 320   | 5,800  | 9  | 21 | 810   | 280 | 400 | 4,500 |
| <b>NIST Standards</b>          |      |           |     |      |     |      |      |      |      |    |       |                     |    |    |     |       |        |    |    |       |     |     |       |
| SRM 2709                       | 2001 | 7.0       | 1.9 | 3.3  | 2.0 | 1.5  | 1.2  | 0.06 | 0.33 | <2 | <10   | 900                 | 3  | 13 | 120 | 33    | 520    | 3  | 80 | 15    | 230 | 110 | 100   |
| SRM 2709                       | 2003 | 7.4       | 2.0 | 3.6  | 2.0 | 1.5  | 1.2  | 0.07 | 0.34 | <2 | 24    | 940                 | <2 | 12 | 120 | 34    | 560    | 4  | 84 | 15    | 230 | 120 | 110   |
| SRM 2711                       | 2001 | 6.4       | 3.0 | 2.8  | 2.4 | 1.0  | 1.2  | 0.09 | 0.27 | 5  | 96    | 720                 | 35 | 9  | 43  | 120   | 620    | 2  | 21 | 1,000 | 250 | 80  | 350   |
| SRM 2711                       | 2003 | 6.6       | 3.0 | 2.7  | 2.4 | 1.0  | 1.2  | 0.09 | 0.27 | 5  | 93    | 720                 | 35 | 10 | 42  | 110   | 620    | 3  | 22 | 1,100 | 230 | 82  | 330   |
| SRM 2704                       | 2001 | 6.3       | 2.8 | 4.2  | 2.1 | 1.3  | 0.63 | 0.11 | 0.26 | <2 | 21    | 470                 | 6  | 19 | 150 | 100   | 590    | 4  | 48 | 150   | 140 | 98  | 450   |
| SRM 2704                       | 2003 | 6.3       | 2.8 | 4.1  | 2.0 | 1.2  | 0.60 | 0.11 | 0.32 | <2 | 27    | 460                 | 4  | 17 | 140 | 96    | 570    | 6  | 46 | 160   | 130 | 98  | 430   |
