# Supplementary material
Source: publisher figshare collection journal article supplement (https://geolsoc.figshare.com/articles/dataset/_/3454634)
Supplement: Supplementary file 2 [file 1]

**Table A3.** Major and trace-element concentrations in HCl - H<sub>2</sub>O<sub>2</sub> leaches of streambed sediment from the Boulder River watershed study area, Montana for samples collected in July 2001.

| Field No.                      | Site | Al<br>ppm | Ca<br>ppm | Fe<br>ppm | K<br>ppm | Mg<br>ppm | Na<br>ppm | P<br>ppm | Ti<br>ppm | Ag<br>ppm | As<br>ppm | Ba<br>ppm | Cd<br>ppm | Co<br>ppm | Cu<br>ppm | Mn<br>ppm | Mo<br>ppm | Ni<br>ppm | Pb<br>ppm | Sb<br>ppm | Sr<br>ppm | V<br>ppm | Zn<br>ppm |
|--------------------------------|------|-----------|-----------|-----------|----------|-----------|-----------|----------|-----------|-----------|-----------|-----------|-----------|-----------|-----------|-----------|-----------|-----------|-----------|-----------|-----------|----------|-----------|
| <b>Boulder River</b>           |      |           |           |           |          |           |           |          |           |           |           |           |           |           |           |           |           |           |           |           |           |          |           |
| 01-BMS-010                     | 2S   | 4,400     | 3,700     | 7,400     | 1,700    | 2,800     | 280       | 730      | 330       | <1        | 9         | 190       | <1        | 5         | 13        | 720       | <1        | 6         | 15        | <3        | 73        | 16       | 74        |
| 01-BMS-011                     | 6S   | 2,900     | 3,000     | 4,900     | 940      | 1,600     | 170       | 890      | 180       | <1        | 14        | 120       | 1         | 4         | 77        | 300       | <1        | 3         | 17        | <3        | 42        | 10       | 150       |
| 01-BMS-014                     | 9S   | 2,600     | 2,500     | 5,000     | 840      | 1,500     | 140       | 730      | 180       | <1        | 15        | 120       | 2         | 4         | 45        | 400       | <1        | 3         | 28        | <3        | 36        | 10       | 260       |
| 01-BMS-017                     | 12S  | 2,500     | 2,500     | 5,500     | 760      | 1,400     | 160       | 610      | 100       | 1         | 73        | 110       | 3         | 7         | 58        | 680       | <1        | 3         | 75        | <3        | 37        | 9        | 470       |
| 01-BMS-018                     | 13S  | 3,100     | 3,000     | 7,000     | 1,000    | 1,900     | 160       | 790      | 200       | 1         | 67        | 130       | 4         | 9         | 64        | 700       | <1        | 4         | 68        | <3        | 44        | 12       | 540       |
| 01-BMS-018-d                   | 13S  | 2,700     | 2,400     | 5,900     | 870      | 1,600     | 130       | 640      | 150       | 1         | 54        | 110       | 3         | 6         | 51        | 570       | <1        | 3         | 56        | <3        | 36        | 10       | 440       |
| 01-BMS-019                     | 15S  | 3,200     | 2,800     | 8,000     | 1,100    | 2,100     | 150       | 670      | 210       | 2         | 99        | 140       | 4         | 7         | 72        | 630       | <1        | 4         | 85        | <3        | 43        | 14       | 520       |
| <b>Basin Creek Drainage</b>    |      |           |           |           |          |           |           |          |           |           |           |           |           |           |           |           |           |           |           |           |           |          |           |
| 01-BMS-001                     | 20S  | 5,700     | 6,900     | 22,000    | 1,400    | 4,500     | 120       | 2,500    | 420       | <1        | 32        | 91        | 2         | 19        | 23        | 830       | 1         | 9         | 75        | <3        | 21        | 48       | 250       |
| 01-BMS-002                     | 21S  | 5,000     | 4,300     | 19,000    | 1,000    | 3,100     | 65        | 1,400    | 420       | 4         | 1,900     | 79        | 5         | 14        | 84        | 1,100     | 1         | 6         | 950       | 15        | 19        | 32       | 600       |
| 01-BMS-006                     | 24S  | 4,000     | 3,100     | 12,000    | 720      | 1,800     | 56        | 840      | 120       | <1        | 100       | 120       | 4         | 15        | 30        | 1,000     | <1        | 7         | 150       | <3        | 25        | 19       | 310       |
| 01-BMS-008                     | 26S  | 3,500     | 2,400     | 11,000    | 690      | 1,700     | 32        | 720      | 120       | 1         | 230       | 84        | 6         | 18        | 130       | 850       | <1        | 5         | 150       | <3        | 16        | 18       | 480       |
| 01-BMS-009                     | 31S  | 3,500     | 3,100     | 9,600     | 850      | 2,000     | 74        | 1,100    | 170       | 1         | 95        | 120       | 6         | 16        | 65        | 1,200     | <1        | 6         | 130       | <3        | 17        | 16       | 580       |
| 01-BMS-007                     | 42S  | 3,900     | 3,400     | 12,000    | 900      | 2,000     | 54        | 1,200    | 230       | 3         | 310       | 90        | 9         | 24        | 200       | 950       | 1         | 6         | 200       | <3        | 14        | 20       | 980       |
| <b>Cataract Creek Drainage</b> |      |           |           |           |          |           |           |          |           |           |           |           |           |           |           |           |           |           |           |           |           |          |           |
| 01-BMS-003                     | 46S  | 3,200     | 3,300     | 9,200     | 650      | 2,200     | 72        | 1,200    | 330       | <1        | 15        | 62        | 1         | 7         | 20        | 310       | <1        | 4         | 39        | <3        | 14        | 22       | 150       |
| 01-BMS-004                     | 49S  | 3,900     | 3,100     | 11,000    | 850      | 2,800     | 98        | 970      | 370       | 3         | 61        | 90        | 3         | 9         | 67        | 660       | <1        | 5         | 110       | <3        | 18        | 21       | 460       |
| 01-BMS-005                     | 50S  | 3,000     | 2,700     | 10,000    | 510      | 1,400     | 81        | 960      | <30       | 7         | 250       | 81        | 16        | 39        | 610       | 1,700     | 1         | 4         | 270       | <3        | 15        | 15       | 1,600     |
| 01-BMS-013                     | 53S  | 4,100     | 4,100     | 10,000    | 1,400    | 3,100     | 120       | 1,000    | 230       | 2         | 100       | 140       | 12        | 21        | 240       | 1,100     | 1         | 7         | 150       | <3        | 21        | 20       | 1,300     |
| 01-BMS-012                     | 57S  | 3,600     | 2,600     | 13,000    | 500      | 1,200     | 70        | 1,000    | <30       | 5         | 540       | 88        | 24        | 48        | 1,200     | 1,800     | 2         | 4         | 540       | 3         | 13        | 18       | 1,400     |
| <b>High Ore Creek Drainage</b> |      |           |           |           |          |           |           |          |           |           |           |           |           |           |           |           |           |           |           |           |           |          |           |
| 01-BMS-015                     | 59S  | 2,600     | 5,200     | 12,000    | 760      | 2,200     | 76        | 1,200    | 53        | 11        | 610       | 120       | 9         | 10        | 74        | 3,300     | 2         | 6         | 1,200     | <3        | 22        | 16       | 1,800     |
| 01-BMS-016                     | 63S  | 1,600     | 5,200     | 17,000    | 550      | 2,300     | 44        | 1,000    | <30       | 17        | 710       | 130       | 19        | 12        | 120       | 5,900     | 6         | 6         | 960       | <3        | 20        | 16       | 4,000     |
| <b>NIST Standards</b>          |      |           |           |           |          |           |           |          |           |           |           |           |           |           |           |           |           |           |           |           |           |          |           |
| SRM 2709                       |      | 8,900     | 12,000    | 14,000    | 1,800    | 8,700     | 480       | 480      | 120       | <2        | <10       | 330       | <2        | 12        | 20        | 400       | <2        | 54        | 8         | <6        | 82        | 33       | 66        |
| SRM 2711                       |      | 6,400     | 20,000    | 8,000     | 2,100    | 5,200     | 130       | 720      | 230       | 4         | 77        | 180       | 36        | 5         | 84        | 470       | <2        | 12        | 1,000     | <6        | 40        | 16       | 250       |
| SRM 2704                       |      | 4,800     | 19,000    | 15,000    | 240      | 6,200     | <60       | 720      | <60       | <2        | 10        | 70        | 3         | 10        | 67        | 340       | <2        | 22        | 100       | <6        | 25        | 10       | 270       |
