# Supplementary material
Source: publisher figshare collection journal article supplement (https://geolsoc.figshare.com/articles/dataset/_/3454634)
Supplement: Supplementary file 3 [file 1]

**Table A4.** Lead isotopic compositions in HCl – H<sub>2</sub>O<sub>2</sub> leaches of streambed sediment from the Boulder River watershed study area, Montana, collected in July 2001 and Sept. 2003. The first two digits of the field number indicate the sampling year. Values are in per mil.

| Field No.                      | Site | <sup>206</sup> Pb/ <sup>204</sup> Pb ± 2 σ |         | <sup>207</sup> Pb/ <sup>204</sup> Pb ± 2 σ |         | <sup>208</sup> Pb/ <sup>204</sup> Pb ± 2 σ |         | <sup>207</sup> Pb/ <sup>206</sup> Pb ± 2 σ |           | <sup>208</sup> Pb/ <sup>206</sup> Pb ± 2 σ |          |
|--------------------------------|------|--------------------------------------------|---------|--------------------------------------------|---------|--------------------------------------------|---------|--------------------------------------------|-----------|--------------------------------------------|----------|
|                                |      | mean                                       |         | mean                                       |         | mean                                       |         | mean                                       |           | mean                                       |          |
| <b>Boulder River</b>           |      |                                            |         |                                            |         |                                            |         |                                            |           |                                            |          |
| 01-BMS-010                     | 2S   | 18.236                                     | ± 0.011 | 15.564                                     | ± 0.014 | 38.288                                     | ± 0.046 | 0.85346                                    | ± 0.00026 | 2.0995                                     | ± 0.0013 |
| 03-BMS-110                     | 2S   | 18.158                                     | ± 0.011 | 15.552                                     | ± 0.014 | 38.186                                     | ± 0.046 | 0.85651                                    | ± 0.00026 | 2.1030                                     | ± 0.0013 |
| 01-BMS-011                     | 6S   | 18.099                                     | ± 0.011 | 15.552                                     | ± 0.014 | 38.148                                     | ± 0.046 | 0.85929                                    | ± 0.00026 | 2.1078                                     | ± 0.0013 |
| 03-BMS-111                     | 6S   | 18.075                                     | ± 0.011 | 15.534                                     | ± 0.014 | 38.089                                     | ± 0.046 | 0.85946                                    | ± 0.00026 | 2.1073                                     | ± 0.0013 |
| 01-BMS-014                     | 9S   | 18.031                                     | ± 0.011 | 15.552                                     | ± 0.014 | 38.094                                     | ± 0.046 | 0.86251                                    | ± 0.00026 | 2.1127                                     | ± 0.0013 |
| 03-BMS-114                     | 9S   | 18.028                                     | ± 0.011 | 15.536                                     | ± 0.014 | 38.012                                     | ± 0.046 | 0.86177                                    | ± 0.00026 | 2.1085                                     | ± 0.0013 |
| 01-BMS-017                     | 12S  | 18.046                                     | ± 0.011 | 15.550                                     | ± 0.014 | 38.102                                     | ± 0.046 | 0.86167                                    | ± 0.00026 | 2.1113                                     | ± 0.0013 |
| 03-BMS-117                     | 12S  | 18.030                                     | ± 0.011 | 15.535                                     | ± 0.014 | 38.044                                     | ± 0.046 | 0.86162                                    | ± 0.00026 | 2.1100                                     | ± 0.0013 |
| 01-BMS-018                     | 13S  | 18.051                                     | ± 0.011 | 15.552                                     | ± 0.014 | 38.117                                     | ± 0.046 | 0.86159                                    | ± 0.00026 | 2.1117                                     | ± 0.0013 |
| 01-BMS-018-d                   | 13S  | 18.050                                     | ± 0.011 | 15.550                                     | ± 0.014 | 38.105                                     | ± 0.046 | 0.86147                                    | ± 0.00026 | 2.1110                                     | ± 0.0013 |
| 03-BMS-118                     | 13S  | 17.970                                     | ± 0.011 | 15.523                                     | ± 0.014 | 38.031                                     | ± 0.046 | 0.86381                                    | ± 0.00026 | 2.1163                                     | ± 0.0013 |
| 01-BMS-019                     | 15S  | 18.043                                     | ± 0.011 | 15.548                                     | ± 0.014 | 38.098                                     | ± 0.046 | 0.86173                                    | ± 0.00026 | 2.1115                                     | ± 0.0013 |
| 03-BMS-119                     | 15S  | 18.023                                     | ± 0.012 | 15.539                                     | ± 0.015 | 38.073                                     | ± 0.047 | 0.86220                                    | ± 0.00026 | 2.1124                                     | ± 0.0013 |
| <b>Basin Creek Drainage</b>    |      |                                            |         |                                            |         |                                            |         |                                            |           |                                            |          |
| 01-BMS-001                     | 20S  | 18.039                                     | ± 0.011 | 15.560                                     | ± 0.014 | 38.040                                     | ± 0.046 | 0.86255                                    | ± 0.00026 | 2.1087                                     | ± 0.0013 |
| 03-BMS-101                     | 20S  | 18.031                                     | ± 0.011 | 15.554                                     | ± 0.014 | 38.019                                     | ± 0.046 | 0.86260                                    | ± 0.00026 | 2.1085                                     | ± 0.0013 |
| 01-BMS-002                     | 21S  | 17.891                                     | ± 0.011 | 15.554                                     | ± 0.014 | 38.030                                     | ± 0.046 | 0.86934                                    | ± 0.00026 | 2.1256                                     | ± 0.0013 |
| 03-BMS-102                     | 21eS | 17.917                                     | ± 0.011 | 15.547                                     | ± 0.014 | 38.011                                     | ± 0.046 | 0.86771                                    | ± 0.00026 | 2.1215                                     | ± 0.0013 |
| 01-BMS-006                     | 24S  | 17.968                                     | ± 0.011 | 15.558                                     | ± 0.014 | 38.048                                     | ± 0.046 | 0.86588                                    | ± 0.00026 | 2.1176                                     | ± 0.0013 |
| 01-BMS-008                     | 26S  | 17.935                                     | ± 0.011 | 15.548                                     | ± 0.014 | 37.998                                     | ± 0.046 | 0.86690                                    | ± 0.00026 | 2.1186                                     | ± 0.0013 |
| 01-BMS-009                     | 31S  | 18.009                                     | ± 0.011 | 15.563                                     | ± 0.014 | 38.070                                     | ± 0.046 | 0.86417                                    | ± 0.00026 | 2.1140                                     | ± 0.0013 |
| 03-BMS-109                     | 31S  | 17.983                                     | ± 0.011 | 15.537                                     | ± 0.014 | 37.982                                     | ± 0.046 | 0.86399                                    | ± 0.00026 | 2.1121                                     | ± 0.0013 |
| 01-BMS-007                     | 42S  | 17.939                                     | ± 0.011 | 15.569                                     | ± 0.014 | 38.056                                     | ± 0.046 | 0.86789                                    | ± 0.00026 | 2.1215                                     | ± 0.0013 |
| 03-BMS-107                     | 42S  | 17.921                                     | ± 0.011 | 15.538                                     | ± 0.014 | 37.939                                     | ± 0.046 | 0.86705                                    | ± 0.00026 | 2.1170                                     | ± 0.0013 |
| <b>Cataract Creek Drainage</b> |      |                                            |         |                                            |         |                                            |         |                                            |           |                                            |          |
| 01-BMS-003                     | 46S  | 18.104                                     | ± 0.011 | 15.555                                     | ± 0.014 | 38.149                                     | ± 0.046 | 0.85921                                    | ± 0.00026 | 2.1073                                     | ± 0.0013 |

|                                |     |        |   |       |        |   |       |        |   |       |         |   |         |        |   |        |
|--------------------------------|-----|--------|---|-------|--------|---|-------|--------|---|-------|---------|---|---------|--------|---|--------|
| 03-BMS-103                     | 46S | 18.022 | ± | 0.011 | 15.542 | ± | 0.014 | 38.069 | ± | 0.046 | 0.86239 | ± | 0.00026 | 2.1124 | ± | 0.0013 |
| 01-BMS-004                     | 49S | 17.927 | ± | 0.011 | 15.543 | ± | 0.014 | 38.034 | ± | 0.046 | 0.86700 | ± | 0.00026 | 2.1216 | ± | 0.0013 |
| 03-BMS-104                     | 49S | 17.921 | ± | 0.013 | 15.533 | ± | 0.015 | 38.002 | ± | 0.048 | 0.86673 | ± | 0.00027 | 2.1205 | ± | 0.0013 |
| 01-BMS-005                     | 50S | 17.920 | ± | 0.011 | 15.545 | ± | 0.014 | 37.993 | ± | 0.046 | 0.86750 | ± | 0.00026 | 2.1202 | ± | 0.0013 |
| 03-BMS-105                     | 50S | 17.914 | ± | 0.019 | 15.543 | ± | 0.020 | 37.976 | ± | 0.057 | 0.86762 | ± | 0.00027 | 2.1199 | ± | 0.0013 |
| 01-BMS-013                     | 53S | 18.108 | ± | 0.011 | 15.562 | ± | 0.014 | 38.096 | ± | 0.046 | 0.85938 | ± | 0.00026 | 2.1038 | ± | 0.0013 |
| 03-BMS-113                     | 53S | 18.018 | ± | 0.011 | 15.531 | ± | 0.014 | 37.931 | ± | 0.046 | 0.86196 | ± | 0.00026 | 2.1051 | ± | 0.0013 |
| 01-BMS-012                     | 57S | 17.923 | ± | 0.011 | 15.553 | ± | 0.014 | 38.000 | ± | 0.046 | 0.86775 | ± | 0.00026 | 2.1201 | ± | 0.0013 |
| 03-BMS-112                     | 57S | 17.921 | ± | 0.012 | 15.554 | ± | 0.015 | 38.006 | ± | 0.047 | 0.86793 | ± | 0.00027 | 2.1207 | ± | 0.0013 |
| <b>High Ore Creek Drainage</b> |     |        |   |       |        |   |       |        |   |       |         |   |         |        |   |        |
| 01-BMS-015                     | 59S | 18.072 | ± | 0.011 | 15.556 | ± | 0.014 | 38.142 | ± | 0.046 | 0.86081 | ± | 0.00026 | 2.1106 | ± | 0.0013 |
| 03-BMS-115                     | 59S | 18.060 | ± | 0.011 | 15.539 | ± | 0.014 | 38.084 | ± | 0.046 | 0.86040 | ± | 0.00026 | 2.1087 | ± | 0.0013 |
| 01-BMS-016                     | 63S | 18.057 | ± | 0.011 | 15.547 | ± | 0.014 | 38.106 | ± | 0.046 | 0.86101 | ± | 0.00026 | 2.1103 | ± | 0.0013 |
| 03-BMS-116                     | 63S | 18.052 | ± | 0.011 | 15.539 | ± | 0.014 | 38.070 | ± | 0.046 | 0.86084 | ± | 0.00026 | 2.1090 | ± | 0.0013 |

---
