# Supplementary material
Source: publisher figshare collection journal article supplement (https://geolsoc.figshare.com/articles/dataset/_/3454634)
Supplement: Supplementary file 4 [file 1]

Table A1. *Physical and chemical properties of water samples collected from the Boulder River Watershed, Montana, 2001-2005.*

| Station name<br>(USGS number)                            | Site<br>(fig. 1) | Date     | Time | Flow <sup>1</sup><br>ft <sup>3</sup> /s | SC <sup>2</sup><br>µS/cm | pH  | TDS <sup>3</sup><br>mg/L | As-<br>dis <sup>4</sup><br>µg/L | As-<br>tot <sup>5</sup><br>µg/L | Cd-<br>dis <sup>3</sup><br>µg/L | Cd-<br>tot <sup>4</sup><br>µg/L | Cu-<br>dis <sup>3</sup><br>µg/L | Cu-<br>tot <sup>4</sup><br>µg/L | Fe-<br>dis <sup>3</sup><br>µg/L | Fe-<br>tot <sup>4</sup><br>µg/L | Pb-<br>dis <sup>3</sup><br>µg/L | Pb-<br>tot <sup>4</sup><br>µg/L | Zn-<br>dis <sup>3</sup><br>µg/L | Zn-<br>tot <sup>4</sup><br>µg/L |
|----------------------------------------------------------|------------------|----------|------|-----------------------------------------|--------------------------|-----|--------------------------|---------------------------------|---------------------------------|---------------------------------|---------------------------------|---------------------------------|---------------------------------|---------------------------------|---------------------------------|---------------------------------|---------------------------------|---------------------------------|---------------------------------|
| <b>Boulder River upstream from Kleinsmith Gulch</b>      |                  |          |      |                                         |                          |     |                          |                                 |                                 |                                 |                                 |                                 |                                 |                                 |                                 |                                 |                                 |                                 |                                 |
| 6031450                                                  | 3W               | 20010427 | 1045 | 401                                     | 77                       | 7.6 | 51.8                     | 3.15                            | 12.9                            | <.04                            | 0.22                            | 4.79                            | 18.3                            | 250                             | 6,550                           | 0.21                            | 5.92                            | 5.61                            | 41.7                            |
| 6031450                                                  | 3W               | 20010516 | 1100 | 413                                     | 66                       | 7.6 | n.d. <sup>6</sup>        | 2.72                            | 3.59                            | <.04                            | 0.05                            | 3.97                            | 5.25                            | n.d.                            | n.d.                            | 0.28                            | 1.15                            | 2.52                            | 5.2                             |
| 6031450                                                  | 3W               | 20010809 | 930  | 16.9                                    | 144                      | 8.2 | n.d.                     | 3.80                            | 5.66                            | <.04                            | <.035                           | 1.44                            | 2.23                            | n.d.                            | n.d.                            | <.08                            | <1                              | 1.56                            | 4.0                             |
| 6031450                                                  | 3W               | 20010925 | 1330 | 9.3                                     | 160                      | 8.5 | n.d.                     | 3.14                            | 3.84                            | <.04                            | <.035                           | 1.31                            | 2.62                            | n.d.                            | n.d.                            | 0.10                            | <1                              | 1.31                            | 6.0                             |
| 6031450                                                  | 3W               | 20020523 | 1255 | 205                                     | 73                       | 7.6 | n.d.                     | 2.81                            | 3.41                            | <.04                            | <.035                           | 3.13                            | 4.13                            | n.d.                            | n.d.                            | 0.11                            | <1                              | 3.28                            | 6.9                             |
| 6031450                                                  | 3W               | 20020613 | 850  | 182                                     | 77                       | 7.7 | 60                       | 2.75                            | 3.96                            | <.04                            | <.035                           | 3.04                            | 3.77                            | 89                              | 462                             | 0.09                            | <1                              | 3.77                            | 8.6                             |
| 6031450                                                  | 3W               | 20030220 | 1240 | 14.6                                    | 144                      | 7.8 | 104                      | 1.72                            | <2                              | <.037                           | <.035                           | 2.30                            | 3.42                            | n.d.                            | n.d.                            | 0.11                            | 0.19                            | 6.12                            | 6.8                             |
| 6031450                                                  | 3W               | 20030512 | 830  | 243                                     | 103                      | 8.1 | n.d.                     | 3.20                            | 4.45                            | <.037                           | 0.05                            | 3.52                            | 5.79                            | n.d.                            | n.d.                            | 0.12                            | 1.19                            | 6.62                            | 11.9                            |
| 6031450                                                  | 3W               | 20030603 | 840  | 390                                     | 53                       | 7.8 | n.d.                     | 3.47                            | 4.77                            | <.037                           | <.035                           | 3.84                            | 5.70                            | n.d.                            | n.d.                            | <.08                            | 1.11                            | 4.37                            | 7.6                             |
| 6031450                                                  | 3W               | 20030820 | 930  | 7.4                                     | 162                      | 7.7 | n.d.                     | 3.77                            | 3.78                            | <.037                           | <.035                           | 2.51                            | 2.63                            | n.d.                            | n.d.                            | <.08                            | 0.20                            | 1.74                            | 3.1                             |
| <b>Boulder River downstream from Little Galena Gulch</b> |                  |          |      |                                         |                          |     |                          |                                 |                                 |                                 |                                 |                                 |                                 |                                 |                                 |                                 |                                 |                                 |                                 |
| 6032400                                                  | 58W              | 20010427 | 1245 | 607                                     | 81                       | 7.4 | 54.6                     | 3.50                            | 17.3                            | 0.13                            | 0.95                            | 8.62                            | 32.1                            | 213                             | 5,140                           | 0.29                            | 10.0                            | 26.3                            | 117                             |
| 6032400                                                  | 58W              | 20010516 | 1330 | 781                                     | 58                       | 6.9 | n.d.                     | 3.63                            | 7.20                            | 0.31                            | 0.48                            | 11.5                            | 15.2                            | n.d.                            | n.d.                            | 0.47                            | 3.64                            | 43.7                            | 57.4                            |
| 6032400                                                  | 58W              | 20010809 | 1230 | 28                                      | 143                      | 8.3 | n.d.                     | 6.71                            | 8.33                            | 0.42                            | 0.55                            | 8.79                            | 10.6                            | n.d.                            | n.d.                            | <.08                            | <1                              | 51.0                            | 58.3                            |
| 6032400                                                  | 58W              | 20010926 | 915  | 14                                      | 172                      | 8.2 | n.d.                     | 5.56                            | 6.99                            | 0.85                            | 0.97                            | 8.17                            | 9.46                            | n.d.                            | n.d.                            | 0.19                            | <1                              | 124                             | 133                             |
| 6032400                                                  | 58W              | 20020522 | 1440 | 397                                     | 65                       | 7.7 | n.d.                     | 3.54                            | 7.95                            | 0.35                            | 0.59                            | 10.8                            | 16.7                            | n.d.                            | n.d.                            | 0.32                            | 4.38                            | 60.2                            | 81.5                            |
| 6032400                                                  | 58W              | 20020613 | 1020 | 404                                     | n.d.                     | 7.5 | 50.6                     | 3.51                            | 7.00                            | 0.38                            | 0.48                            | 10.8                            | 13.7                            | 90                              | 384                             | 0.25                            | 2.19                            | 55.3                            | 66.9                            |
| 6032400                                                  | 58W              | 20030221 | 915  | 18                                      | 147                      | 8.1 | 105                      | 3.42                            | 4.30                            | 0.68                            | 0.76                            | 8.17                            | 10.6                            | n.d.                            | n.d.                            | 0.16                            | 0.55                            | 117                             | 135                             |
| 6032400                                                  | 58W              | 20030513 | 1315 | 332                                     | 98                       | 7.7 | n.d.                     | 3.77                            | 5.01                            | 0.23                            | 0.32                            | 7.61                            | 9.66                            | n.d.                            | n.d.                            | 0.24                            | 1.14                            | 38.0                            | 50.0                            |
| 6032400                                                  | 58W              | 20030605 | 1000 | 497                                     | 59                       | 7.8 | n.d.                     | 3.95                            | 7.37                            | 0.20                            | 0.43                            | 9.05                            | 17.9                            | n.d.                            | n.d.                            | 0.38                            | 4.23                            | 34.3                            | 51.7                            |
| 6032400                                                  | 58W              | 20030820 | 1330 | 12                                      | 171                      | 7.7 | n.d.                     | 9.72                            | 9.23                            | 0.30                            | 0.38                            | 8.90                            | 10.1                            | n.d.                            | n.d.                            | 0.10                            | 0.34                            | 30.7                            | 37.0                            |
| 6032400                                                  | 58W              | 20040322 | 1200 | 61                                      | 148                      | 7.8 | n.d.                     | 3.72                            | 7.11                            | 0.29                            | 0.55                            | 7.84                            | 11.7                            | n.d.                            | n.d.                            | 0.19                            | 1.80                            | 64.8                            | 96.2                            |
| 6032400                                                  | 58W              | 20040524 | 1330 | 329                                     | 79                       | 7.5 | n.d.                     | 2.94                            | 5.18                            | 0.21                            | 0.35                            | 6.90                            | 9.64                            | n.d.                            | n.d.                            | 0.14                            | 1.66                            | 39.6                            | 55.0                            |
| 6032400                                                  | 58W              | 20040729 | 1300 | 23                                      | 149                      | 8.6 | n.d.                     | 6.21                            | 7.37                            | 0.37                            | 0.42                            | 7.65                            | 8.24                            | n.d.                            | n.d.                            | 0.15                            | 0.22                            | 42.8                            | 47.1                            |
| 6032400                                                  | 58W              | 20040922 | 1330 | 105                                     | 130                      | 8.1 | n.d.                     | 3.46                            | 4.15                            | 0.39                            | 0.53                            | 6.24                            | 7.41                            | n.d.                            | n.d.                            | 0.12                            | 0.72                            | 54.3                            | 70.7                            |
| 6032400                                                  | 58W              | 20050502 | 830  | 82                                      | 111                      | 7.7 | n.d.                     | 3.31                            | 4.41                            | 0.29                            | 0.32                            | 6.56                            | 7.96                            | n.d.                            | n.d.                            | 0.28                            | 0.76                            | 55.5                            | 61.6                            |
| 6032400                                                  | 58W              | 20050523 | 930  | 703                                     | 60                       | 7.5 | n.d.                     | 3.96                            | 7.60                            | 0.23                            | 0.38                            | 8.12                            | 15.7                            | n.d.                            | n.d.                            | 0.38                            | 4.41                            | 35.2                            | 52.7                            |
| 6032400                                                  | 58W              | 20050804 | 830  | 32                                      | 140                      | 7.9 | n.d.                     | 5.81                            | 5.35                            | 0.45                            | 0.45                            | 7.11                            | 7.53                            | n.d.                            | n.d.                            | 0.14                            | 0.32                            | 65.4                            | 77.2                            |
| 6032400                                                  | 58W              | 20050922 | 830  | 27                                      | 158                      | 7.6 | n.d.                     | 4.50                            | 5.00                            | 0.46                            | 0.55                            | 5.20                            | 6.10                            | n.d.                            | n.d.                            | 0.07                            | 0.39                            | 92.6                            | 99.0                            |
| <b>Basin Creek downstream from Buckeye Mine</b>          |                  |          |      |                                         |                          |     |                          |                                 |                                 |                                 |                                 |                                 |                                 |                                 |                                 |                                 |                                 |                                 |                                 |
| 462347112180400                                          | 8W               | 20010426 | 1300 | 0.82                                    | 86                       | 7.3 | 52.8                     | 33.7                            | 54.9                            | 0.64                            | 0.65                            | 8.64                            | 9.40                            | 442                             | 807                             | 3.90                            | 8.84                            | 120                             | 120                             |
| 462347112180400                                          | 8W               | 20010808 | 1030 | 0.94                                    | 81                       | 7.8 | n.d.                     | 20.6                            | 31.3                            | 0.24                            | 0.34                            | 2.60                            | 4.79                            | n.d.                            | n.d.                            | 1.22                            | 3.11                            | 50.5                            | 52.7                            |
| 462347112180400                                          | 8W               | 20010925 | 915  | 0.38                                    | 88                       | 7.5 | n.d.                     | 19.6                            | 31.6                            | 0.19                            | 0.33                            | 1.41                            | 2.99                            | n.d.                            | n.d.                            | 0.86                            | 3.51                            | 48.6                            | 54.6                            |
| 462347112180400                                          | 8W               | 20011115 | 920  | 0.52                                    | 81                       | 7.1 | n.d.                     | 11.9                            | 18.8                            | 0.44                            | 0.47                            | 2.93                            | 4.18                            | 182                             | 360                             | 0.32                            | <1                              | 79.2                            | 86.8                            |

| Station name<br>(USGS number)                          | Site<br>(fig. 1) | Date     | Time | Flow <sup>1</sup><br>ft <sup>3</sup> /s | SC <sup>2</sup><br>µS/cm | pH   | TDS <sup>3</sup><br>mg/L | As-<br>dis <sup>4</sup><br>µg/L | As-<br>tot <sup>5</sup><br>µg/L | Cd-<br>dis <sup>3</sup><br>µg/L | Cd-<br>tot <sup>4</sup><br>µg/L | Cu-<br>dis <sup>3</sup><br>µg/L | Cu-<br>tot <sup>4</sup><br>µg/L | Fe-<br>dis <sup>3</sup><br>µg/L | Fe-<br>tot <sup>4</sup><br>µg/L | Pb-<br>dis <sup>3</sup><br>µg/L | Pb-<br>tot <sup>4</sup><br>µg/L | Zn-<br>dis <sup>3</sup><br>µg/L | Zn-<br>tot <sup>4</sup><br>µg/L |  |
|--------------------------------------------------------|------------------|----------|------|-----------------------------------------|--------------------------|------|--------------------------|---------------------------------|---------------------------------|---------------------------------|---------------------------------|---------------------------------|---------------------------------|---------------------------------|---------------------------------|---------------------------------|---------------------------------|---------------------------------|---------------------------------|--|
| 462347112180400                                        | 8W               | 20020611 | 945  | 2.8                                     | n.d.                     | 7.4  | n.d.                     | 13.7                            | 17.6                            | 0.59                            | 0.61                            | 7.39                            | 7.83                            | 141                             | 209                             | 1.31                            | 3.24                            | 96.7                            | 95.4                            |  |
| 462347112180400                                        | 8W               | 20020617 | 1100 | 9.3                                     | 45                       | 6.8  | n.d.                     | 13.6                            | 15.1                            | 0.39                            | 0.40                            | 5.94                            | 5.62                            | n.d.                            | n.d.                            | 1.32                            | 2.74                            | 57.2                            | 61.8                            |  |
| 462347112180400                                        | 8W               | 20030324 | 1230 | 0.48                                    | 83                       | n.d. | 68.8                     | 19.1                            | 24.4                            | 0.23                            | 0.24                            | 2.74                            | 3.03                            | n.d.                            | n.d.                            | 0.50                            | 1.02                            | 49.8                            | 52.3                            |  |
| 462347112180400                                        | 8W               | 20030514 | 1030 | 1.9                                     | 72                       | 7.5  | n.d.                     | 44.3                            | 66.9                            | 0.91                            | 0.97                            | 10.2                            | 12.0                            | n.d.                            | n.d.                            | 1.24                            | 5.18                            | 187                             | 192                             |  |
| 462347112180400                                        | 8W               | 20030603 | 1050 | 11                                      | 37                       | 7.3  | n.d.                     | 13.4                            | 19.7                            | 0.30                            | 0.32                            | 4.50                            | 5.16                            | n.d.                            | n.d.                            | 1.00                            | 4.32                            | 49.5                            | 53.7                            |  |
| 462347112180400                                        | 8W               | 20030821 | 1255 | 0.35                                    | 86                       | 7.4  | n.d.                     | 34.7                            | 37.1                            | 0.15                            | 0.14                            | 2.08                            | 2.20                            | n.d.                            | n.d.                            | 1.27                            | 1.45                            | 22.8                            | 22.5                            |  |
| 462347112180400                                        | 8W               | 20040330 | 1315 | 0.70                                    | 86                       | 7.4  | n.d.                     | 16.2                            | 6.09                            | 0.61                            | 0.64                            | 5.80                            | 5.90                            | n.d.                            | n.d.                            | 1.04                            | 1.85                            | 113                             | 114                             |  |
| 462347112180400                                        | 8W               | 20040524 | 945  | 5.2                                     | 50                       | 7.1  | n.d.                     | 8.55                            | 8.72                            | 0.64                            | 0.63                            | 7.62                            | 7.37                            | n.d.                            | n.d.                            | 1.35                            | 2.30                            | 92.2                            | 86.5                            |  |
| 462347112180400                                        | 8W               | 20040729 | 900  | 0.75                                    | 77                       | 7.3  | n.d.                     | 12.5                            | 19.0                            | 0.18                            | 0.22                            | 1.47                            | 2.31                            | n.d.                            | n.d.                            | 0.20                            | 1.19                            | 36.1                            | 38.0                            |  |
| 462347112180400                                        | 8W               | 20040922 | 900  | 0.92                                    | 78                       | 7.6  | n.d.                     | 11.7                            | 14.6                            | 0.25                            | 0.28                            | 2.36                            | 3.15                            | n.d.                            | n.d.                            | 0.24                            | 0.58                            | 52.8                            | 53.1                            |  |
| 462347112180400                                        | 8W               | 20050504 | 1410 | 2.4                                     | 80                       | 6.8  | n.d.                     | 43.8                            | 56.1                            | 0.70                            | 0.75                            | 7.34                            | 8.42                            | n.d.                            | n.d.                            | 1.35                            | 3.42                            | 133                             | 128                             |  |
| 462347112180400                                        | 8W               | 20050524 | 830  | 10                                      | 43                       | 7.6  | n.d.                     | 10.2                            | 12.6                            | 0.26                            | 0.29                            | 3.57                            | 4.59                            | n.d.                            | n.d.                            | 0.94                            | 3.23                            | 41.6                            | 44.6                            |  |
| 462347112180400                                        | 8W               | 20050803 | 900  | 0.76                                    | 75                       | 7.4  | n.d.                     | 13.9                            | 14.4                            | 0.11                            | 0.11                            | 1.60                            | 1.62                            | n.d.                            | n.d.                            | 0.29                            | 0.58                            | 27.3                            | 29.8                            |  |
| 462347112180400                                        | 8W               | 20050921 | 900  | 0.89                                    | 82                       | 7.6  | n.d.                     | 15.5                            | 20.5                            | 0.06                            | 0.13                            | 0.90                            | 1.70                            | n.d.                            | n.d.                            | 0.20                            | 2.15                            | 23.7                            | 24.0                            |  |
| <b>Jack Creek upstream from Bullion Mine Tributary</b> |                  |          |      |                                         |                          |      |                          |                                 |                                 |                                 |                                 |                                 |                                 |                                 |                                 |                                 |                                 |                                 |                                 |  |
| 462155112181500                                        | 16W              | 20030324 | 1415 | 0.39                                    | 96                       | 7.8  | 70.8                     | 4.73                            | 3.95                            | 0.26                            | 0.24                            | 3.00                            | 3.23                            | n.d.                            | n.d.                            | <.08                            | <.05                            | 54.3                            | 40.4                            |  |
| 462155112181500                                        | 16W              | 20030513 | 1150 | 2.0                                     | 83                       | 7.6  | n.d.                     | 3.60                            | 3.65                            | 0.10                            | 0.10                            | 3.17                            | 3.48                            | n.d.                            | n.d.                            | <.08                            | 0.28                            | 19.4                            | 18.7                            |  |
| 462155112181500                                        | 16W              | 20030603 | 1300 | 11                                      | 41                       | 7.4  | n.d.                     | 4.67                            | 7.90                            | 0.07                            | 0.10                            | 4.75                            | 6.36                            | n.d.                            | n.d.                            | 0.12                            | 2.05                            | 14.3                            | 21.1                            |  |
| 462155112181500                                        | 16W              | 20030821 | 1145 | 0.25                                    | 128                      | 7.2  | n.d.                     | 6.28                            | 6.42                            | 0.08                            | 0.08                            | 1.85                            | 1.75                            | n.d.                            | n.d.                            | <.08                            | 0.07                            | 10.7                            | 9.4                             |  |
| 462155112181500                                        | 16W              | 20040330 | 1200 | 0.57                                    | 129                      | 7.4  | n.d.                     | 4.72                            | 5.23                            | n.d.                            | 0.34                            | n.d.                            | 3.94                            | n.d.                            | n.d.                            | n.d.                            | <.05                            | n.d.                            | 47.5                            |  |
| 462155112181500                                        | 16W              | 20040524 | 1120 | 3.9                                     | 65                       | 7.5  | n.d.                     | 4.08                            | 5.07                            | 0.13                            | 0.11                            | 4.79                            | 4.73                            | n.d.                            | n.d.                            | 0.11                            | 0.31                            | 21.4                            | 18.9                            |  |
| 462155112181500                                        | 16W              | 20040730 | 1200 | 0.48                                    | 92                       | 7.3  | n.d.                     | 5.97                            | 7.33                            | 0.21                            | 0.21                            | 3.45                            | 3.50                            | n.d.                            | n.d.                            | <.08                            | 0.17                            | 31.0                            | 29.7                            |  |
| 462155112181500                                        | 16W              | 20040923 | 1200 | 1.8                                     | 86                       | 7.6  | n.d.                     | 5.86                            | 5.61                            | 0.09                            | 0.09                            | 3.45                            | 3.15                            | n.d.                            | n.d.                            | 0.17                            | 0.20                            | 20.2                            | 12.2                            |  |
| 462155112181500                                        | 16W              | 20050502 | 1400 | 0.78                                    | 118                      | 7.7  | n.d.                     | 3.98                            | 4.12                            | 0.16                            | 0.16                            | 2.79                            | 3.33                            | n.d.                            | n.d.                            | <.08                            | 0.12                            | 27.0                            | 26.4                            |  |
| 462155112181500                                        | 16W              | 20050524 | 1130 | 7.7                                     | 58                       | 7.4  | n.d.                     | 4.01                            | 5.22                            | 0.06                            | 0.07                            | 4.17                            | 25.6                            | n.d.                            | n.d.                            | 0.11                            | 0.93                            | 9.01                            | 11.9                            |  |
| 462155112181500                                        | 16W              | 20050803 | 1100 | 0.94                                    | 86                       | 7.4  | n.d.                     | 6.12                            | 5.83                            | 0.10                            | 0.08                            | 2.81                            | 2.42                            | n.d.                            | n.d.                            | <.08                            | 0.11                            | 12.7                            | 14.4                            |  |
| 462155112181500                                        | 16W              | 20050921 | 1200 | 0.73                                    | 98                       | 7.2  | n.d.                     | 5.20                            | 5.30                            | 0.21                            | 0.21                            | 3.00                            | 3.30                            | n.d.                            | n.d.                            | <.08                            | 0.07                            | 31.5                            | 31.0                            |  |
| <b>Bullion Mine Tributary at mouth</b>                 |                  |          |      |                                         |                          |      |                          |                                 |                                 |                                 |                                 |                                 |                                 |                                 |                                 |                                 |                                 |                                 |                                 |  |
| 462153112181700                                        | 17W              | 20010516 | 1500 | 2.6                                     | 88                       | 6.0  | n.d.                     | 9.04                            | 60.8                            | 11.5                            | 12.3                            | 110                             | 164                             | n.d.                            | n.d.                            | 1.27                            | 19.1                            | 1,340                           | 1,350                           |  |
| 462153112181700                                        | 17W              | 20010808 | 1330 | 0.32                                    | 198                      | 6.2  | n.d.                     | 0.55                            | 59.2                            | 34.6                            | 37.6                            | 287                             | 514                             | n.d.                            | n.d.                            | 0.13                            | 15.0                            | 4,230                           | 3,830                           |  |
| 462153112181700                                        | 17W              | 20010925 | 1040 | 0.17                                    | 284                      | 5.1  | n.d.                     | 0.56                            | 31.1                            | 57.6                            | 59.2                            | 744                             | 750                             | n.d.                            | n.d.                            | 2.73                            | 10.8                            | 6,670                           | 6,810                           |  |
| 462153112181700                                        | 17W              | 20011115 | 1030 | 0.20                                    | 207                      | 6.5  | n.d.                     | 0.78                            | 12.8                            | 34.4                            | 34.7                            | 187                             | 264                             | <10                             | 492                             | 0.10                            | 5.78                            | 4,420                           | 4,140                           |  |
| 462153112181700                                        | 17W              | 20020523 | 1045 | 1.6                                     | n.d.                     | 7.3  | n.d.                     | 5.52                            | 35.8                            | 10.2                            | 9.51                            | 106                             | 119                             | n.d.                            | n.d.                            | 1.24                            | 12.9                            | 1,270                           | 1,160                           |  |
| 462153112181700                                        | 17W              | 20020611 | 1325 | 2.0                                     | n.d.                     | 7.2  | n.d.                     | 14.9                            | 40.6                            | 8.04                            | 8.03                            | 101                             | 123                             | 476                             | 861                             | 1.85                            | 10.4                            | 884                             | 901                             |  |
| 462153112181700                                        | 17W              | 20030324 | 1340 | 0.15                                    | 136                      | 7.6  | 135                      | 0.69                            | 3.57                            | 22.0                            | 22.2                            | 93.8                            | 150                             | n.d.                            | n.d.                            | 0.10                            | 2.87                            | 2,640                           | 2,690                           |  |
| 462153112181700                                        | 17W              | 20030513 | 1225 | 0.60                                    | 123                      | 7.7  | n.d.                     | 1.45                            | 9.19                            | 10.9                            | 11.1                            | 41.1                            | 117                             | n.d.                            | n.d.                            | 0.14                            | 3.53                            | 1,210                           | 1,250                           |  |
| 462153112181700                                        | 17W              | 20030603 | 1230 | 5.7                                     | 54                       | 7.3  | n.d.                     | 8.03                            | 54.6                            | 3.15                            | 3.47                            | 52.0                            | 71.1                            | n.d.                            | n.d.                            | 1.58                            | 19.4                            | 347                             | 391                             |  |

| Station name<br>(USGS number) | Site<br>(fig. 1) | Date     | Time | Flow <sup>1</sup><br>ft <sup>3</sup> /s | SC <sup>2</sup><br>µS/cm | pH  | TDS <sup>3</sup><br>mg/L | As-<br>dis <sup>4</sup><br>µg/L | As-<br>tot <sup>5</sup><br>µg/L | Cd-<br>dis <sup>3</sup><br>µg/L | Cd-<br>tot <sup>4</sup><br>µg/L | Cu-<br>dis <sup>3</sup><br>µg/L | Cu-<br>tot <sup>4</sup><br>µg/L | Fe-<br>dis <sup>3</sup><br>µg/L | Fe-<br>tot <sup>4</sup><br>µg/L | Pb-<br>dis <sup>3</sup><br>µg/L | Pb-<br>tot <sup>4</sup><br>µg/L | Zn-<br>dis <sup>3</sup><br>µg/L | Zn-<br>tot <sup>4</sup><br>µg/L |
|-------------------------------|------------------|----------|------|-----------------------------------------|--------------------------|-----|--------------------------|---------------------------------|---------------------------------|---------------------------------|---------------------------------|---------------------------------|---------------------------------|---------------------------------|---------------------------------|---------------------------------|---------------------------------|---------------------------------|---------------------------------|
| 462153112181700               | 17W              | 20030821 | 1130 | 0.23                                    | 626                      | 4.3 | n.d.                     | 5.05                            | 15.3                            | 77.1                            | 76.7                            | 1099                            | 1066                            | n.d.                            | n.d.                            | 12.9                            | 15.2                            | 8,110                           | 7,810                           |
| 462153112181700               | 17W              | 20031028 | 1250 | 0.14                                    | 278                      | 5.0 | n.d.                     | 0.40                            | 7.65                            | 50.7                            | 48.8                            | 472                             | 625                             | n.d.                            | n.d.                            | 3.54                            | 6.13                            | 5,290                           | 5,280                           |
| 462153112181700               | 17W              | 20040330 | 1140 | 0.15                                    | 176                      | 7.0 | n.d.                     | 3.51                            | 3.14                            | 20.2                            | n.d.                            | 128                             | n.d.                            | n.d.                            | n.d.                            | 2.09                            |                                 | 2,380                           |                                 |
| 462153112181700               | 17W              | 20040524 | 1150 | 1.8                                     | 86                       | 7.2 | n.d.                     | 5.93                            | 14.5                            | 6.38                            | 6.26                            | 71.5                            | 73.4                            | n.d.                            | n.d.                            | 1.47                            | 4.57                            | 774                             | 716                             |
| 462153112181700               | 17W              | 20040706 | 1315 | 0.68                                    | 122                      | 6.8 | n.d.                     | 0.97                            | 24.1                            | 15.7                            | 15.4                            | 38.7                            | 224                             | n.d.                            | n.d.                            | 0.08                            | 4.41                            | 1,780                           | 1,760                           |
| 462153112181700               | 17W              | 20040730 | 1230 | 0.21                                    | 231                      | 4.9 | n.d.                     | 0.67                            | 26.9                            | 37.7                            | 38.1                            | 533                             | 555                             | n.d.                            | n.d.                            | 2.53                            | 9.40                            | 4,520                           | 4,270                           |
| 462153112181700               | 17W              | 20040827 | 1400 | 0.30                                    | 108                      | 6.0 | n.d.                     | 0.65                            | 12.2                            | 28.2                            | 27.7                            | 121                             | 313                             | n.d.                            | n.d.                            | <.08                            | 4.65                            | 784                             | 3,110                           |
| 462153112181700               | 17W              | 20040923 | 1130 | 0.65                                    | 153                      | 6.8 | n.d.                     | 1.15                            | 8.72                            | 18.1                            | 18.6                            | 47.8                            | 217                             | n.d.                            | n.d.                            | 0.34                            | 4.57                            | 1,980                           | 2,120                           |
| 462153112181700               | 17W              | 20041109 | 830  | 0.17                                    | 185                      | 6.2 | n.d.                     | 1.01                            | 4.24                            | 24.2                            | 22.9                            | 115                             | 197                             | n.d.                            | n.d.                            | 0.32                            | 2.68                            | 2,540                           | 2,760                           |
| 462153112181700               | 17W              | 20050502 | 1430 | 0.30                                    | 147                      | 7.5 | n.d.                     | 1.97                            | 17.4                            | 12.1                            | 12.7                            | 40.0                            | 137                             | n.d.                            | n.d.                            | 0.64                            | 7.15                            | 1,350                           | 1,480                           |
| 462153112181700               | 17W              | 20050524 | 1200 | 3.6                                     | 60                       | 7.2 | n.d.                     | 5.13                            | 28.5                            | 3.11                            | 3.20                            | 36.5                            | 53.4                            | n.d.                            | n.d.                            | 1.98                            | 18.2                            | 340                             | 370                             |
| 462153112181700               | 17W              | 20050712 | 1200 | 1.1                                     | 118                      | 7.2 | n.d.                     | 2.24                            | 37.8                            | 17.1                            | 18.1                            | 112                             | 294                             | n.d.                            | n.d.                            | 0.34                            | 5.11                            | 1,950                           | 2,080                           |
| 462153112181700               | 17W              | 20050803 | 1130 | 0.37                                    | 218                      | 4.5 | n.d.                     | 2.05                            | 40.8                            | 36.4                            | 35.5                            | 604                             | 659                             | n.d.                            | n.d.                            | 4.39                            | 9.78                            | 4,240                           | 4,510                           |
| 462153112181700               | 17W              | 20050921 | 1130 | 0.25                                    | 290                      | 4.0 | n.d.                     | 1.50                            | 22.3                            | 49.9                            | 51.2                            | 760                             | 866                             | n.d.                            | n.d.                            | 8.95                            | 12.5                            | 5,120                           | 5,740                           |
| <b>Jack Creek at mouth</b>    |                  |          |      |                                         |                          |     |                          |                                 |                                 |                                 |                                 |                                 |                                 |                                 |                                 |                                 |                                 |                                 |                                 |
| 462047112201900               | 63W              | 20010426 | 1515 | 6.7                                     | 86                       | 7.3 | 61                       | 3.49                            | 32.1                            | 2.97                            | 4.61                            | 44.6                            | 170                             | 82                              | 2,500                           | 0.39                            | 12.15                           | 359                             | 514                             |
| 462047112201900               | 63W              | 20010516 | 1000 | 18                                      | 46                       | 7.2 | n.d.                     | 4.23                            | 12.6                            | 1.60                            | 1.80                            | 26.7                            | 32.3                            | n.d.                            | n.d.                            | 0.43                            | 4.14                            | 200                             | 215                             |
| 462047112201900               | 63W              | 20010808 | 1430 | 1.7                                     | 97                       | 7.7 | n.d.                     | 6.11                            | 12.6                            | 2.18                            | 2.53                            | 14.3                            | 23.7                            | n.d.                            | n.d.                            | 0.26                            | 1.47                            | 243                             | 256                             |
| 462047112201900               | 63W              | 20010925 | 1130 | 0.98                                    | 113                      | 7.5 | n.d.                     | 2.82                            | 7.04                            | 4.11                            | 4.43                            | 10.7                            | 32.6                            | n.d.                            | n.d.                            | <.08                            | <1                              | 448                             | 537                             |
| 462047112201900               | 63W              | 20020522 | 940  | 17                                      | 56                       | 8.1 | n.d.                     | 4.11                            | 21.0                            | 1.43                            | 2.09                            | 26.5                            | 43.4                            | n.d.                            | n.d.                            | 0.38                            | 8.78                            | 192                             | 217                             |
| 462047112201900               | 63W              | 20020611 | 1115 | 13                                      | n.d.                     | 7.1 | n.d.                     | 5.98                            | 11.3                            | 1.49                            | 1.61                            | 24.9                            | 28.7                            | 143                             | 363                             | 0.52                            | 2.74                            | 184                             | 190                             |
| 462047112201900               | 63W              | 20030423 | 1100 | 14                                      | 48                       | 7.5 | 56.9                     | 6.77                            | 64.9                            | 1.83                            | 3.61                            | 35.6                            | 133                             | n.d.                            | n.d.                            | 1.12                            | 26.4                            | 237                             | 409                             |
| 462047112201900               | 63W              | 20030513 | 1335 | 11                                      | 66                       | 7.7 | n.d.                     | 4.76                            | 7.68                            | 1.20                            | 1.36                            | 17.5                            | 22.1                            | n.d.                            | n.d.                            | 0.25                            | 1.77                            | 160                             | 173                             |
| 462047112201900               | 63W              | 20030604 | 840  | 22                                      | 42                       | 7.7 | n.d.                     | 5.79                            | 20.9                            | 0.80                            | 1.01                            | 18.2                            | 26.7                            | n.d.                            | n.d.                            | 0.45                            | 7.17                            | 99.5                            | 123                             |
| 462047112201900               | 63W              | 20030820 | 1050 | 1.3                                     | 114                      | 7.9 | n.d.                     | 5.35                            | 7.97                            | 3.17                            | 3.30                            | 12.3                            | 22.9                            | n.d.                            | n.d.                            | 0.12                            | 0.62                            | 372                             | 391                             |
| 462047112201900               | 63W              | 20040322 | 830  | 1.36                                    | 103                      | 7.9 | n.d.                     | 2.79                            | 5.43                            | 2.74                            | 2.85                            | 18.7                            | 36.9                            | n.d.                            | n.d.                            | 0.21                            | 1.18                            | 368                             | 379                             |
| 462047112201900               | 63W              | 20040524 | 1030 | 12                                      | 63                       | 7.4 | n.d.                     | 3.74                            | 6.77                            | 1.32                            | 1.41                            | 20.8                            | 24.4                            | n.d.                            | n.d.                            | 0.43                            | 1.87                            | 175                             | 174                             |
| 462047112201900               | 63W              | 20040729 | 1000 | 1.4                                     | 98                       | 7.5 | n.d.                     | 3.84                            | 7.53                            | 2.53                            | 2.68                            | 13.6                            | 23.2                            | n.d.                            | n.d.                            | 0.11                            | 0.64                            | 331                             | 339                             |
| 462047112201900               | 63W              | 20040922 | 1000 | 2.1                                     | 103                      | 7.5 | n.d.                     | 2.54                            | 4.94                            | 3.83                            | 3.81                            | 19.4                            | 34.8                            | n.d.                            | n.d.                            | 0.18                            | 0.81                            | 456                             | 473                             |
| 462047112201900               | 63W              | 20050502 | 1220 | 4.9                                     | 92                       | 7.6 | n.d.                     | 4.08                            | 10.9                            | 1.58                            | 2.04                            | 17.6                            | 33.2                            | n.d.                            | n.d.                            | 0.63                            | 4.34                            | 226                             | 261                             |
| 462047112201900               | 63W              | 20050524 | 945  | 22                                      | 52                       | 7.4 | n.d.                     | 4.35                            | 13.0                            | 0.80                            | 0.96                            | 14.1                            | 21.0                            | n.d.                            | n.d.                            | 0.44                            | 4.26                            | 93.3                            | 109                             |
| 462047112201900               | 63W              | 20050803 | 1000 | 2.3                                     | 99                       | 7.4 | n.d.                     | 4.42                            | 7.48                            | 3.76                            | 3.43                            | 23.9                            | 40.5                            | n.d.                            | n.d.                            | 0.35                            | 1.09                            | 414                             | 434                             |
| 462047112201900               | 63W              | 20050921 | 1000 | 1.8                                     | 107                      | 7.6 | n.d.                     | 2.60                            | 4.70                            | 3.16                            | 3.54                            | 13.6                            | 27.0                            | n.d.                            | n.d.                            | 0.08                            | 0.32                            | 406                             | 423                             |
| <b>Basin Creek at mouth</b>   |                  |          |      |                                         |                          |     |                          |                                 |                                 |                                 |                                 |                                 |                                 |                                 |                                 |                                 |                                 |                                 |                                 |
| 6031600                       | 24W              | 20010426 | 1015 | 24                                      | 86                       | 7.3 | 61.8                     | 4.28                            | 11.8                            | 0.47                            | 0.70                            | 8.84                            | 14.3                            | 98                              | 675                             | 0.37                            | 2.60                            | 85.1                            | 103                             |
| 6031600                       | 24W              | 20010517 | 830  | 126                                     | 41                       | 7.3 | n.d.                     | 4.40                            | 8.48                            | 0.38                            | 0.46                            | 8.73                            | 9.65                            | n.d.                            | n.d.                            | 0.57                            | 2.92                            | 61.4                            | 66.9                            |
| 6031600                       | 24W              | 20010809 | 1030 | 5.8                                     | 95                       | 7.8 | n.d.                     | 6.45                            | 9.14                            | 0.23                            | 0.33                            | 4.14                            | 5.18                            | n.d.                            | n.d.                            | 0.19                            | <1                              | 40.5                            | 44.7                            |

| Station name<br>(USGS number)   | Site<br>(fig. 1) | Date     | Time | Flow <sup>1</sup><br>ft <sup>3</sup> /s | SC <sup>2</sup><br>µS/cm | pH   | TDS <sup>3</sup><br>mg/L | As-<br>dis <sup>4</sup><br>µg/L | As-<br>tot <sup>5</sup><br>µg/L | Cd-<br>dis <sup>3</sup><br>µg/L | Cd-<br>tot <sup>4</sup><br>µg/L | Cu-<br>dis <sup>3</sup><br>µg/L | Cu-<br>tot <sup>4</sup><br>µg/L | Fe-<br>dis <sup>3</sup><br>µg/L | Fe-<br>tot <sup>4</sup><br>µg/L | Pb-<br>dis <sup>3</sup><br>µg/L | Pb-<br>tot <sup>4</sup><br>µg/L | Zn-<br>dis <sup>3</sup><br>µg/L | Zn-<br>tot <sup>4</sup><br>µg/L |
|---------------------------------|------------------|----------|------|-----------------------------------------|--------------------------|------|--------------------------|---------------------------------|---------------------------------|---------------------------------|---------------------------------|---------------------------------|---------------------------------|---------------------------------|---------------------------------|---------------------------------|---------------------------------|---------------------------------|---------------------------------|
| 6031600                         | 24W              | 20010925 | 1230 | 2.9                                     | 112                      | 7.7  | n.d.                     | 5.39                            | 6.32                            | 0.27                            | 0.27                            | 2.90                            | 3.42                            | n.d.                            | n.d.                            | 0.12                            | <1                              | 35.4                            | 42.7                            |
| 6031600                         | 24W              | 20020522 | 1050 | 113                                     | 44                       | 7.6  | n.d.                     | 3.98                            | 11.7                            | 0.40                            | 0.63                            | 8.57                            | 12.8                            | n.d.                            | n.d.                            | 0.48                            | 6.49                            | 70.8                            | 83.2                            |
| 6031600                         | 24W              | 20020611 | 1420 | 72                                      | n.d.                     | 7.6  | 41.9                     | 4.08                            | 6.17                            | 0.36                            | 0.38                            | 8.72                            | 8.93                            | 68                              | 200                             | 0.29                            | 1.49                            | 52.2                            | 56.9                            |
| 6031600                         | 24W              | 20030220 | 1000 | 4.2                                     | 102                      | 7.8  | 74.6                     | 3.12                            | 3.93                            | 0.30                            | 0.33                            | 2.11                            | 2.87                            | n.d.                            | n.d.                            | 0.11                            | 0.29                            | 66.9                            | 73.8                            |
| 6031600                         | 24W              | 20030513 | 900  | 62                                      | 49                       | 8.0  | n.d.                     | 5.08                            | 7.42                            | 0.30                            | 0.37                            | 6.54                            | 8.05                            | n.d.                            | n.d.                            | 0.33                            | 1.42                            | 56.6                            | 68.9                            |
| 6031600                         | 24W              | 20030604 | 1000 | 106                                     | 39                       | 7.5  | n.d.                     | 5.16                            | 10.4                            | 0.28                            | 0.36                            | 7.89                            | 10.9                            | n.d.                            | n.d.                            | 0.37                            | 3.74                            | 41.1                            | 54.0                            |
| 6031600                         | 24W              | 20030820 | 1140 | 2.7                                     | 108                      | 7.2  | n.d.                     | 7.42                            | 7.81                            | 0.24                            | 0.24                            | 3.14                            | 3.26                            | n.d.                            | n.d.                            | <.08                            | 0.24                            | 32.5                            | 32.1                            |
| 6031600                         | 24W              | 20040322 | 1000 | 7.5                                     | 100                      | 7.5  | n.d.                     | 3.29                            | 4.44                            | 0.51                            | 0.54                            | 4.11                            | 5.23                            | n.d.                            | n.d.                            | <.08                            | 0.44                            | 91.2                            | 88.9                            |
| 6031600                         | 24W              | 20040524 | 930  | 67                                      | 50                       | 7.2  | n.d.                     | 3.29                            | 4.50                            | 0.34                            | 0.37                            | 7.28                            | 9.27                            | n.d.                            | n.d.                            | 0.26                            | 1.61                            | 54.7                            | 57.3                            |
| 6031600                         | 24W              | 20040729 | 1130 | 4.7                                     | 92                       | 7.8  | n.d.                     | 5.80                            | 7.04                            | 0.25                            | 0.27                            | 4.52                            | 3.97                            | n.d.                            | n.d.                            | 0.17                            | 0.26                            | 39.9                            | 40.6                            |
| 6031600                         | 24W              | 20040922 | 1100 | 7.0                                     | 92                       | 7.7  | n.d.                     | 3.99                            | 4.91                            | 0.34                            | 0.39                            | 4.15                            | 5.08                            | n.d.                            | n.d.                            | 0.09                            | 0.41                            | 64.2                            | 68.5                            |
| 6031600                         | 24W              | 20050502 | 1100 | 24                                      | 76                       | 7.7  | n.d.                     | 4.09                            | 5.52                            | 0.28                            | 0.33                            | 5.27                            | 7.19                            | n.d.                            | n.d.                            | 0.36                            | 1.21                            | 56.7                            | 62.0                            |
| 6031600                         | 24W              | 20050523 | 1315 | 131                                     | 42                       | 7.4  | n.d.                     | 4.24                            | 7.36                            | 0.29                            | 0.38                            | 6.68                            | 9.18                            | n.d.                            | n.d.                            | 0.37                            | 3.28                            | 36.4                            | 47.9                            |
| 6031600                         | 24W              | 20050803 | 1300 | 7.3                                     | 85                       | 7.8  | n.d.                     | 6.89                            | 6.60                            | 0.24                            | 0.23                            | 4.63                            | 4.76                            | n.d.                            | n.d.                            | 0.16                            | 0.30                            | 31.9                            | 37.0                            |
| 6031600                         | 24W              | 20050921 | 1330 | 4.8                                     | 103                      | 8.0  | n.d.                     | 4.90                            | 5.40                            | 0.22                            | 0.22                            | 3.80                            | 3.00                            | n.d.                            | n.d.                            | 0.13                            | 0.17                            | 37.2                            | 35.0                            |
| <b>Uncle Sam Gulch at mouth</b> |                  |          |      |                                         |                          |      |                          |                                 |                                 |                                 |                                 |                                 |                                 |                                 |                                 |                                 |                                 |                                 |                                 |
| 461904112144400                 | 43W              | 20010517 | 1205 | 5.4                                     | 75                       | 7.0  | n.d.                     | 3.28                            | 58.8                            | 13.0                            | 13.9                            | 162                             | 260                             | n.d.                            | n.d.                            | 0.57                            | 11.6                            | 1,170                           | 1,170                           |
| 461904112144400                 | 43W              | 20010809 | 1430 | 0.56                                    | 167                      | 7.3  | n.d.                     | 1.28                            | 8.34                            | 44.1                            | 48.6                            | 69.3                            | 243                             | n.d.                            | n.d.                            | 0.25                            | 4.41                            | 4,070                           | 3,920                           |
| 461904112144400                 | 43W              | 20010926 | 1145 | 0.28                                    | 194                      | n.d. | n.d.                     | 1.02                            | 3.97                            | 52.9                            | 54.6                            | 187                             | 321                             | n.d.                            | n.d.                            | 0.38                            | 3.80                            | 4,520                           | 4,700                           |
| 461904112144400                 | 43W              | 20011115 | 1200 | 0.71                                    | 151                      | 7.2  | n.d.                     | 1.12                            | 4.51                            | 38.8                            | 39.2                            | 125                             | 237                             | <10                             | 101                             | 0.28                            | 3.01                            | 3,730                           | 3,520                           |
| 461904112144400                 | 43W              | 20020523 | 1255 | 4.8                                     | n.d.                     | 7.2  | n.d.                     | 5.51                            | 74.9                            | 14.9                            | 15.5                            | 176                             | 345                             | n.d.                            | n.d.                            | 1.45                            | 34.2                            | 1,490                           | 1,410                           |
| 461904112144400                 | 43W              | 20020612 | 1220 | 6.0                                     | n.d.                     | 7.7  | n.d.                     | 4.07                            | 47.3                            | 12.5                            | 13.1                            | 177                             | 282                             | 285                             | 991                             | 1.13                            | 9.04                            | 1,120                           | 1,100                           |
| 461904112144400                 | 43W              | 20030325 | 930  | 0.54                                    | 112                      | 7.5  | 92.5                     | 2.85                            | 3.26                            | 24.2                            | 23.0                            | 74.8                            | 87.9                            | n.d.                            | n.d.                            | 0.27                            | 0.82                            | 2,040                           | 2,170                           |
| 461904112144400                 | 43W              | 20030513 | 1035 | 3.4                                     | 74                       | 8.0  |                          | 4.48                            | 15.2                            | 11.1                            | 11.2                            | 90.2                            | 125                             | n.d.                            | n.d.                            | 0.83                            | 8.19                            | 1,010                           | 1,020                           |
| 461904112144400                 | 43W              | 20030604 | 1140 | 8.4                                     | 46                       | 7.4  | n.d.                     | 6.23                            | 58.7                            | 4.85                            | 6.28                            | 77.8                            | 173                             | n.d.                            | n.d.                            | 1.31                            | 40.0                            | 453                             | 560                             |
| 461904112144400                 | 43W              | 20030821 | 910  | 0.37                                    | 269                      | 8.0  | n.d.                     | 4.85                            | 5.01                            | 19.8                            | 19.6                            | 32.5                            | 38.3                            | n.d.                            | n.d.                            | 0.18                            | 0.59                            | 1,730                           | 1,650                           |
| 461904112144400                 | 43W              | 20040330 | 1015 | 1.1                                     | 117                      | 7.1  | n.d.                     | 4.93                            | 24.9                            | 17.5                            | 20.3                            | 86.2                            | 165                             | n.d.                            | n.d.                            | 0.93                            | 3.57                            | 1,720                           | 2,400                           |
| 461904112144400                 | 43W              | 20040524 | 1430 | 3.6                                     | 73                       | 7.2  | n.d.                     | 5.55                            | 13.8                            | 8.75                            | 8.48                            | 84.0                            | 101                             | n.d.                            | n.d.                            | 1.56                            | 8.68                            | 826                             | 803                             |
| 461904112144400                 | 43W              | 20040706 | 900  | 1.5                                     | 102                      | 7.5  | n.d.                     | 4.79                            | 12.0                            | 16.0                            | 15.5                            | 72.6                            | 109                             | n.d.                            | n.d.                            | 1.20                            | 5.91                            | 1,460                           | 1,470                           |
| 461904112144400                 | 43W              | 20040730 | 900  | 0.56                                    | 156                      | 7.4  | n.d.                     | 2.98                            | 7.28                            | 27.3                            | 28.1                            | 38.0                            | 106                             | n.d.                            | n.d.                            | 0.09                            | 2.57                            | 2,470                           | 2,440                           |
| 461904112144400                 | 43W              | 20040827 | 1100 | 0.79                                    | 135                      | 7.5  | n.d.                     | 6.28                            | 13.9                            | 22.7                            | 21.7                            | 96.2                            | 116                             | n.d.                            | n.d.                            | 2.25                            | 9.31                            | 684                             | 2,035                           |
| 461904112144400                 | 43W              | 20040923 | 830  | 1.5                                     | 121                      | 7.8  | n.d.                     | 3.94                            | 21.1                            | 21.1                            | 21.6                            | 97.9                            | 168                             | n.d.                            | n.d.                            | 1.34                            | 16.9                            | 1,830                           | 1,940                           |
| 461904112144400                 | 43W              | 20041109 | 1230 | 0.55                                    | 142                      | 6.3  | n.d.                     | 3.92                            | 4.31                            | 19.5                            | 18.3                            | 54.3                            | 60.0                            | n.d.                            | n.d.                            | 0.33                            | 1.00                            | 1,740                           | 1,850                           |
| 461904112144400                 | 43W              | 20050504 | 1020 | 1.0                                     | 112                      | 7.5  | n.d.                     | 4.87                            | 8.86                            | 12.5                            | 12.5                            | 60.9                            | 71.2                            | n.d.                            | n.d.                            | 0.63                            | 3.91                            | 1,180                           | 1,200                           |
| 461904112144400                 | 43W              | 20050524 | 1445 | 7.0                                     | 57                       | 7.1  | n.d.                     | 7.25                            | 66.4                            | 5.12                            | 7.17                            | 70.1                            | 176                             | n.d.                            | n.d.                            | 1.17                            | 38.2                            | 452                             | 578                             |
| 461904112144400                 | 43W              | 20050712 | 830  | 1.6                                     | 101                      | 7.8  | n.d.                     | 5.54                            | 17.9                            | 12.6                            | 13.4                            | 75.8                            | 107                             | n.d.                            | n.d.                            | 1.03                            | 6.47                            | 1,200                           | 1,300                           |

| Station name<br>(USGS number)  | Site<br>(fig. 1) | Date     | Time | Flow <sup>1</sup><br>ft <sup>3</sup> /s | SC <sup>2</sup><br>µS/cm | pH  | TDS <sup>3</sup><br>mg/L | As-<br>dis <sup>4</sup><br>µg/L | As-<br>tot <sup>5</sup><br>µg/L | Cd-<br>dis <sup>3</sup><br>µg/L | Cd-<br>tot <sup>4</sup><br>µg/L | Cu-<br>dis <sup>3</sup><br>µg/L | Cu-<br>tot <sup>4</sup><br>µg/L | Fe-<br>dis <sup>3</sup><br>µg/L | Fe-<br>tot <sup>4</sup><br>µg/L | Pb-<br>dis <sup>3</sup><br>µg/L | Pb-<br>tot <sup>4</sup><br>µg/L | Zn-<br>dis <sup>3</sup><br>µg/L | Zn-<br>tot <sup>4</sup><br>µg/L |
|--------------------------------|------------------|----------|------|-----------------------------------------|--------------------------|-----|--------------------------|---------------------------------|---------------------------------|---------------------------------|---------------------------------|---------------------------------|---------------------------------|---------------------------------|---------------------------------|---------------------------------|---------------------------------|---------------------------------|---------------------------------|
| 461904112144400                | 43W              | 20050804 | 1000 | 0.74                                    | 21                       | 7.7 | n.d.                     | 6.54                            | 8.22                            | 22.7                            | 21.0                            | 82.8                            | 95.2                            | n.d.                            | n.d.                            | 0.99                            | 2.48                            | 1,960                           | 1,990                           |
| 461904112144400                | 43W              | 20050922 | 1045 | 0.81                                    | 162                      | 7.3 | n.d.                     | 4.00                            | 5.50                            | 21.9                            | 23.4                            | 61.2                            | 80.2                            | n.d.                            | n.d.                            | 0.41                            | 1.41                            | 1,970                           | 1,950                           |
| <b>Cataract Creek at mouth</b> |                  |          |      |                                         |                          |     |                          |                                 |                                 |                                 |                                 |                                 |                                 |                                 |                                 |                                 |                                 |                                 |                                 |
| 6031960                        | 47W              | 20010427 | 900  | 22.4                                    | 99                       | 7.7 | 67.3                     | 3.14                            | 11.9                            | 3.49                            | 4.02                            | 60.0                            | 103                             | 112                             | 572                             | 0.74                            | 6.71                            | 325                             | 376                             |
| 6031960                        | 47W              | 20010517 | 1300 | 60                                      | 55                       | 7.2 | n.d.                     | 2.68                            | 8.97                            | 1.25                            | 1.47                            | 28.7                            | 32.6                            | n.d.                            | n.d.                            | 0.39                            | 3.30                            | 134                             | 145                             |
| 6031960                        | 47W              | 20010809 | 1130 | 3.9                                     | 135                      | 7.9 | n.d.                     | 3.52                            | 5.17                            | 3.45                            | 4.03                            | 11.7                            | 17.1                            | n.d.                            | n.d.                            | 0.09                            | <1                              | 296                             | 287                             |
| 6031960                        | 47W              | 20010926 | 1025 | 2.2                                     | 155                      | 8.2 | n.d.                     | 3.27                            | 4.07                            | 4.70                            | 4.73                            | 11.7                            | 13.5                            | n.d.                            | n.d.                            | 0.14                            | <1                              | 333                             | 381                             |
| 6031960                        | 47W              | 20020523 | 1425 | 51.8                                    | n.d.                     | 7.0 | n.d.                     | 3.11                            | 7.83                            | 1.67                            | 1.76                            | 30.6                            | 37.5                            | n.d.                            | n.d.                            | 0.98                            | 4.28                            | 198                             | 186                             |
| 6031960                        | 47W              | 20020612 | 900  | 86.6                                    | n.d.                     | 7.8 | n.d.                     | 2.45                            | 7.18                            | 1.17                            | 1.31                            | 25.4                            | 30.7                            | 99                              | 327                             | 0.34                            | 2.76                            | 129                             | 139                             |
| 6031960                        | 47W              | 20030220 | 1115 | 2.3                                     | 130                      | 7.5 | 91.1                     | 3.12                            | 2.80                            | 3.01                            | 3.07                            | 9.52                            | 10.2                            | n.d.                            | n.d.                            | 0.37                            | 0.39                            | 284                             | 307                             |
| 6031960                        | 47W              | 20030513 | 1145 | 46                                      | 71                       | 7.7 | n.d.                     | 2.30                            | 4.03                            | 1.19                            | 1.34                            | 16.5                            | 22.0                            | n.d.                            | n.d.                            | 0.29                            | 1.65                            | 139                             | 148                             |
| 6031960                        | 47W              | 20030604 | 1300 | 67.6                                    | 50                       | 7.3 | n.d.                     | 3.42                            | 11.3                            | 0.84                            | 1.05                            | 19.9                            | 26.9                            | n.d.                            | n.d.                            | 0.55                            | 6.21                            | 97.8                            | 118                             |
| 6031960                        | 47W              | 20030820 | 1230 | 2                                       | 155                      | 8.2 | n.d.                     | 5.53                            | 5.12                            | 1.91                            | 1.89                            | 7.13                            | 8.59                            | n.d.                            | n.d.                            | <.08                            | 0.15                            | 130                             | 129                             |
| 6031960                        | 47W              | 20040322 | 1100 | 4.56                                    | 132                      | 7.6 | n.d.                     | 3.11                            | 3.56                            | 2.22                            | 2.29                            | 10.2                            | 11.3                            | n.d.                            | n.d.                            | 0.13                            | 0.39                            | 232                             | 228                             |
| 6031960                        | 47W              | 20040524 | 1200 | 44.6                                    | 57                       | 7.4 | n.d.                     | 2.38                            | 3.93                            | 0.98                            | 1.11                            | 15.5                            | 18.7                            | n.d.                            | n.d.                            | 0.26                            | 2.00                            | 126                             | 128                             |
| 6031960                        | 47W              | 20040729 | 1200 | 3.83                                    | 129                      | 8.0 | n.d.                     | 3.91                            | 4.73                            | 2.44                            | 2.51                            | 8.93                            | 10.8                            | n.d.                            | n.d.                            | 0.10                            | 0.41                            | 216                             | 212                             |
| 6031960                        | 47W              | 20040922 | 1230 | 8.33                                    | 112                      | 7.8 | n.d.                     | 2.63                            | 3.15                            | 2.97                            | 3.13                            | 17.0                            | 21.6                            | n.d.                            | n.d.                            | 0.18                            | 1.05                            | 283                             | 286                             |
| 6031960                        | 47W              | 20050502 | 1000 | 7.42                                    | 104                      | 7.8 | n.d.                     | 2.72                            | 3.55                            | 1.34                            | 1.49                            | 12.8                            | 15.9                            | n.d.                            | n.d.                            | 0.56                            | 2.23                            | 160                             | 167                             |
| 6031960                        | 47W              | 20050523 | 1230 | 118                                     | 47                       | 7.6 | n.d.                     | 2.93                            | 10.8                            | 0.67                            | 0.98                            | 15.7                            | 25.9                            | n.d.                            | n.d.                            | 0.52                            | 7.57                            | 77.8                            | 102                             |
| 6031960                        | 47W              | 20050803 | 1400 | 5.06                                    | 123                      | 7.8 | n.d.                     | 5.25                            | 5.05                            | 2.07                            | 1.90                            | 11.1                            | 12.1                            | n.d.                            | n.d.                            | 0.25                            | 0.76                            | 155                             | 177                             |
| 6031960                        | 47W              | 20050922 | 930  | 3.30                                    | 145                      | 7.8 | n.d.                     | 3.70                            | 3.90                            | 2.56                            | 2.66                            | 8.70                            | 8.60                            | n.d.                            | n.d.                            | 0.15                            | 0.29                            | 245                             | 245                             |
| <b>High Ore Creek at mouth</b> |                  |          |      |                                         |                          |     |                          |                                 |                                 |                                 |                                 |                                 |                                 |                                 |                                 |                                 |                                 |                                 |                                 |
| 6032300                        | 56W              | 20010406 | 1300 | 1.53                                    | 342                      | 8.1 | 216                      | 18.3                            | 87.6                            | 3.14                            | 6.30                            | 3.39                            | 18.9                            | <10                             | 1,660                           | 0.09                            | 64.9                            | 1,335                           | 1,800                           |
| 6032300                        | 56W              | 20010925 | 1440 | 0.41                                    | 404                      | 8.3 | n.d.                     | 27.1                            | 33.5                            | 3.24                            | 3.58                            | 2.98                            | 4.46                            | n.d.                            | n.d.                            | 0.27                            | 3.47                            | 559                             | 607                             |
| 6032300                        | 56W              | 20011115 | 1300 | 0.44                                    | 361                      | 7.9 | n.d.                     | 18.9                            | 24.1                            | 4.01                            | 4.17                            | 2.29                            | 3.20                            | <10                             | 65.0                            | 0.23                            | 3.71                            | 1,140                           | 1,180                           |
| 6032300                        | 56W              | 20020522 | 1400 | 7.1                                     | 238                      | 8.2 | n.d.                     | 20.3                            | 52.3                            | 2.63                            | 3.84                            | 5.26                            | 15.6                            | n.d.                            | n.d.                            | 1.21                            | 48.1                            | 773                             | 944                             |
| 6032300                        | 56W              | 20020612 | 1335 | 4                                       | 183                      | 8.2 | 145                      | 18.2                            | 48.6                            | 2.98                            | 4.12                            | 5.51                            | 11.9                            | 38                              | 736                             | 0.76                            | 36.8                            | 720                             | 973                             |
| 6032300                        | 56W              | 20020809 | 945  | 1.28                                    | 347                      | 8.3 | n.d.                     | 22.7                            | 32.9                            | 2.91                            | 3.31                            | 4.44                            | 7.98                            | n.d.                            | n.d.                            | 5.21                            | 17.6                            | 743                             | 844                             |

<sup>1</sup>Streamflow in ft<sup>3</sup>/s.

<sup>2</sup>Specific conductance in µS/cm at 25°C.

<sup>3</sup>Total dissolved solids. Total concentration of material that passes through a 0.45-µm filter.

<sup>4</sup>Dissolved metal concentration. Concentration of a metal that passes through a 0.45-µm filter.

<sup>5</sup>Total concentration is the concentration of a metal in the unfiltered fraction and includes dissolved and suspended material.

<sup>6</sup>Not determined.
